# Supplementary material
Source: Springer Nature journal article supplement (https://www.springermedizin.de/resource/supplementary/13075_2012_3589_MOESM4_ESM.pdf/9694872)

MS1

MS/MS

A

DSGEGDFLAEGGGV<sup>R</sup>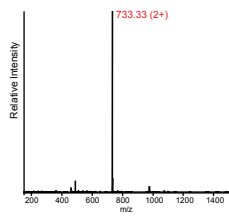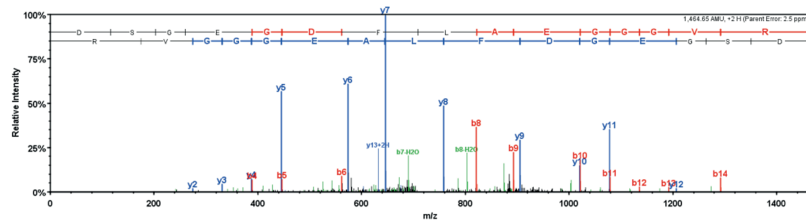DSGEGDFLAEGGGV<sup>cR</sup>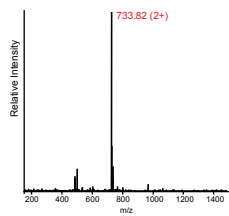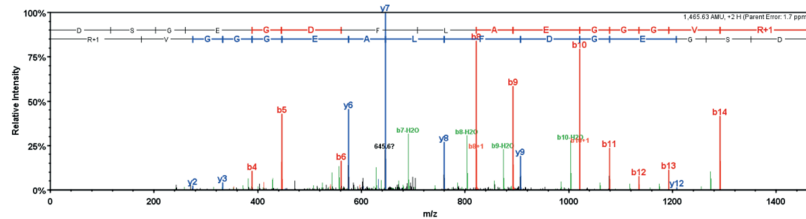

B

NRGDSTFESK<sup>Y</sup>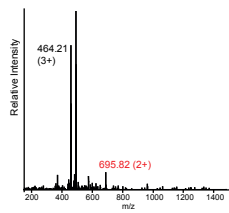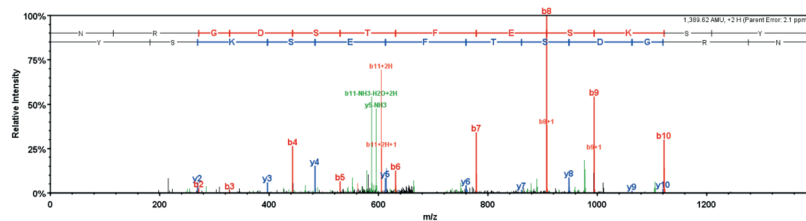NcRGDSTFESK<sup>Y</sup>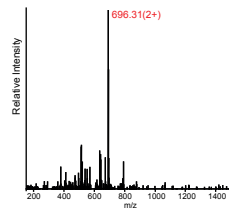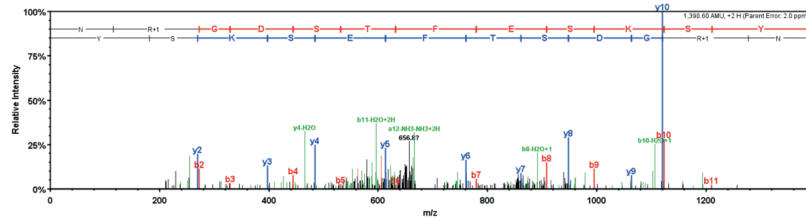

Supplement: MOESM4 [file 9694872]
